# Supplementary material for: Phosphine‐Free Palladium‐Catalyzed Direct C‐3 Arylation of 2‐Phenylimidazo[1,2‐a]pyridine Using Silver(I) Carboxylate
Source: Hindawi journal article supplement (doi:10.1155/2013/305934), 2012-09-16
Supplement: f1 [file 305934.f1.doc]

**Supplementary information**

### Title: Phosphine Free Palladium Catalyzed Direct C-3 Arylation of 2-Phenylimidazo [1,2-a]pyridine Using Silver(I) Carboxylate

**Authors**: Sridevi Kona,1 Rama Suresh Ravi,1 and Manab Chakravarty*2

*1School of Chemistry, University of Hyderabad, Hyderabad, Andhra Pradesh, India.*

*2Chemistry Department, bChemistry Department, Birla Institute of Technology and Sciences-Pilani Hyderabad Campus, Shamirpet, Hyderabad-500078 AP*

**S1**: 1H and 13C NMR spectra for compounds 3**a**-**j**

**S2:** CIF file for compound **3c**

**S1**: 1H and 13C NMR spectra for compounds 3**a**-**j**

**S2:** CIF file for compound **3c**

data_prs32_m

_audit_creation_method SHELXL-97

_chemical_name_systematic

;

?

;

_chemical_name_common ?

_chemical_melting_point ?

_chemical_formula_moiety 'C20 H16 N2'

_chemical_formula_sum

'C20 H16 N2'

_chemical_formula_weight 284.35

loop_

_atom_type_symbol

_atom_type_description

_atom_type_scat_dispersion_real

_atom_type_scat_dispersion_imag

_atom_type_scat_source

'C' 'C' 0.0033 0.0016

'International Tables Vol C Tables 4.2.6.8 and 6.1.1.4'

'H' 'H' 0.0000 0.0000

'International Tables Vol C Tables 4.2.6.8 and 6.1.1.4'

'N' 'N' 0.0061 0.0033

'International Tables Vol C Tables 4.2.6.8 and 6.1.1.4'

_symmetry_cell_setting monoclinic

_symmetry_space_group_name_H-M P2(1)/n

loop_

_symmetry_equiv_pos_as_xyz

'x, y, z'

'-x+1/2, y+1/2, -z+1/2'

'-x, -y, -z'

'x-1/2, -y-1/2, z-1/2'

_cell_length_a 7.4312(15)

_cell_length_b 11.708(2)

_cell_length_c 17.611(4)

_cell_angle_alpha 90.00

_cell_angle_beta 95.36(3)

_cell_angle_gamma 90.00

_cell_volume 1525.6(5)

_cell_formula_units_Z 4

_cell_measurement_temperature 293(2)

_cell_measurement_reflns_used ?

_cell_measurement_theta_min ?

_cell_measurement_theta_max ?

_exptl_crystal_description ?

_exptl_crystal_colour ?

_exptl_crystal_size_max 0.20

_exptl_crystal_size_mid 0.18

_exptl_crystal_size_min 0.15

_exptl_crystal_density_meas ?

_exptl_crystal_density_diffrn 1.238

_exptl_crystal_density_method 'not measured'

_exptl_crystal_F_000 600

_exptl_absorpt_coefficient_mu 0.073

_exptl_absorpt_correction_type empirical

_exptl_absorpt_correction_T_min 0.9855

_exptl_absorpt_correction_T_max 0.9891

_exptl_absorpt_process_details 'sadabs, sheldrick (1996)'

_exptl_special_details

;

?

;

_diffrn_ambient_temperature 293(2)

_diffrn_radiation_wavelength 0.71073

_diffrn_radiation_type MoK\a

_diffrn_radiation_source 'fine-focus sealed tube'

_diffrn_radiation_monochromator graphite

_diffrn_measurement_device_type ?

_diffrn_measurement_method ?

_diffrn_detector_area_resol_mean ?

_diffrn_standards_number ?

_diffrn_standards_interval_count ?

_diffrn_standards_interval_time ?

_diffrn_standards_decay_% ?

_diffrn_reflns_number 14194

_diffrn_reflns_av_R_equivalents 0.0313

_diffrn_reflns_av_sigmaI/netI 0.0215

_diffrn_reflns_limit_h_min -8

_diffrn_reflns_limit_h_max 8

_diffrn_reflns_limit_k_min -13

_diffrn_reflns_limit_k_max 13

_diffrn_reflns_limit_l_min -20

_diffrn_reflns_limit_l_max 20

_diffrn_reflns_theta_min 2.09

_diffrn_reflns_theta_max 25.00

_reflns_number_total 2677

_reflns_number_gt 2254

_reflns_threshold_expression >2sigma(I)

_computing_data_collection 'Bruker smart'

_computing_cell_refinement 'Bruker smart'

_computing_data_reduction 'Bruker saint'

_computing_structure_solution 'SHELXS-97 (Sheldrick, 1990)'

_computing_structure_refinement 'SHELXL-97 (Sheldrick, 1997)'

_computing_molecular_graphics 'Bruker SHELXTL'

_computing_publication_material 'Bruker SHELXTL''

_refine_special_details

;

Refinement of F^2^ against ALL reflections. The weighted R-factor wR and

goodness of fit S are based on F^2^, conventional R-factors R are based

on F, with F set to zero for negative F^2^. The threshold expression of

F^2^ > 2sigma(F^2^) is used only for calculating R-factors(gt) etc. and is

not relevant to the choice of reflections for refinement. R-factors based

on F^2^ are statistically about twice as large as those based on F, and R-

factors based on ALL data will be even larger.

;

_refine_ls_structure_factor_coef Fsqd

_refine_ls_matrix_type full

_refine_ls_weighting_scheme calc

_refine_ls_weighting_details

'calc w=1/[\s^2^(Fo^2^)+(0.0539P)^2^+0.4268P] where P=(Fo^2^+2Fc^2^)/3'

_atom_sites_solution_primary direct

_atom_sites_solution_secondary difmap

_atom_sites_solution_hydrogens geom

_refine_ls_hydrogen_treatment constr

_refine_ls_extinction_method none

_refine_ls_extinction_coef ?

_refine_ls_number_reflns 2677

_refine_ls_number_parameters 200

_refine_ls_number_restraints 0

_refine_ls_R_factor_all 0.0609

_refine_ls_R_factor_gt 0.0513

_refine_ls_wR_factor_ref 0.1263

_refine_ls_wR_factor_gt 0.1208

_refine_ls_goodness_of_fit_ref 1.081

_refine_ls_restrained_S_all 1.081

_refine_ls_shift/su_max 0.000

_refine_ls_shift/su_mean 0.000

loop_

_atom_site_label

_atom_site_type_symbol

_atom_site_fract_x

_atom_site_fract_y

_atom_site_fract_z

_atom_site_U_iso_or_equiv

_atom_site_adp_type

_atom_site_occupancy

_atom_site_symmetry_multiplicity

_atom_site_calc_flag

_atom_site_refinement_flags

_atom_site_disorder_assembly

_atom_site_disorder_group

N2 N 0.0011(2) 0.04530(13) 0.38277(8) 0.0474(4) Uani 1 1 d . . .

N1 N 0.1376(2) 0.21066(12) 0.35985(8) 0.0439(4) Uani 1 1 d . . .

C5 C 0.0831(2) 0.13584(15) 0.41493(10) 0.0447(4) Uani 1 1 d . . .

C1 C 0.2322(3) 0.30909(16) 0.37939(11) 0.0542(5) Uani 1 1 d . . .

H1 H 0.2694 0.3572 0.3419 0.065 Uiso 1 1 calc R . .

C14 C 0.1187(2) 0.21721(15) 0.21647(10) 0.0456(4) Uani 1 1 d . . .

C19 C 0.0572(3) 0.32721(15) 0.19980(10) 0.0476(5) Uani 1 1 d . . .

H19 H -0.0023 0.3667 0.2359 0.057 Uiso 1 1 calc R . .

C6 C 0.0019(2) 0.06123(14) 0.30577(10) 0.0435(4) Uani 1 1 d . . .

C15 C 0.2077(3) 0.15890(17) 0.16221(11) 0.0569(5) Uani 1 1 d . . .

H15 H 0.2510 0.0854 0.1723 0.068 Uiso 1 1 calc R . .

C13 C 0.0854(2) 0.16222(15) 0.28936(10) 0.0438(4) Uani 1 1 d . . .

C17 C 0.1704(3) 0.3198(2) 0.07831(11) 0.0624(6) Uani 1 1 d . . .

H17 H 0.1889 0.3537 0.0319 0.075 Uiso 1 1 calc R . .

C8 C -0.0643(3) -0.13983(16) 0.27010(12) 0.0562(5) Uani 1 1 d . . .

H8 H -0.0090 -0.1613 0.3175 0.067 Uiso 1 1 calc R . .

C18 C 0.0817(3) 0.37995(17) 0.13101(11) 0.0523(5) Uani 1 1 d . . .

C12 C -0.1667(3) 0.0048(2) 0.18157(12) 0.0656(6) Uani 1 1 d . . .

H12 H -0.1806 0.0814 0.1684 0.079 Uiso 1 1 calc R . .

C4 C 0.1230(3) 0.16430(18) 0.49241(11) 0.0558(5) Uani 1 1 d . . .

H4 H 0.0871 0.1165 0.5304 0.067 Uiso 1 1 calc R . .

C7 C -0.0782(2) -0.02503(15) 0.25140(10) 0.0477(5) Uani 1 1 d . . .

C2 C 0.2699(3) 0.33438(19) 0.45357(12) 0.0660(6) Uani 1 1 d . . .

H2 H 0.3338 0.4007 0.4673 0.079 Uiso 1 1 calc R . .

C9 C -0.1309(3) -0.22244(19) 0.21965(16) 0.0716(7) Uani 1 1 d . . .

H9 H -0.1195 -0.2991 0.2330 0.086 Uiso 1 1 calc R . .

C3 C 0.2141(3) 0.2620(2) 0.51097(12) 0.0669(6) Uani 1 1 d . . .

H3 H 0.2402 0.2816 0.5620 0.080 Uiso 1 1 calc R . .

C16 C 0.2318(3) 0.2104(2) 0.09341(12) 0.0655(6) Uani 1 1 d . . .

H16 H 0.2900 0.1709 0.0569 0.079 Uiso 1 1 calc R . .

C10 C -0.2140(3) -0.1923(2) 0.14995(16) 0.0788(8) Uani 1 1 d . . .

H10 H -0.2562 -0.2484 0.1154 0.095 Uiso 1 1 calc R . .

C11 C -0.2347(3) -0.0791(2) 0.13119(13) 0.0800(7) Uani 1 1 d . . .

H11 H -0.2946 -0.0585 0.0845 0.096 Uiso 1 1 calc R . .

C20 C 0.0098(3) 0.49811(19) 0.11535(13) 0.0704(6) Uani 1 1 d . . .

H20A H 0.0543 0.5269 0.0696 0.106 Uiso 1 1 calc R . .

H20B H 0.0489 0.5472 0.1574 0.106 Uiso 1 1 calc R . .

H20C H -0.1199 0.4959 0.1091 0.106 Uiso 1 1 calc R . .

loop_

_atom_site_aniso_label

_atom_site_aniso_U_11

_atom_site_aniso_U_22

_atom_site_aniso_U_33

_atom_site_aniso_U_23

_atom_site_aniso_U_13

_atom_site_aniso_U_12

N2 0.0548(9) 0.0435(8) 0.0441(9) 0.0072(7) 0.0055(7) 0.0023(7)

N1 0.0466(9) 0.0417(8) 0.0436(8) 0.0005(6) 0.0057(6) 0.0020(7)

C5 0.0461(10) 0.0451(10) 0.0434(10) 0.0052(8) 0.0056(8) 0.0056(8)

C1 0.0586(12) 0.0491(11) 0.0555(12) -0.0043(9) 0.0082(9) -0.0068(9)

C14 0.0488(11) 0.0442(10) 0.0437(10) 0.0010(8) 0.0040(8) -0.0078(8)

C19 0.0489(11) 0.0493(11) 0.0447(10) 0.0016(8) 0.0050(8) -0.0059(8)

C6 0.0490(10) 0.0384(9) 0.0431(10) 0.0047(7) 0.0040(8) 0.0037(8)

C15 0.0691(13) 0.0498(11) 0.0531(12) -0.0060(9) 0.0125(10) -0.0052(10)

C13 0.0501(10) 0.0422(10) 0.0391(10) 0.0017(7) 0.0037(8) 0.0019(8)

C17 0.0704(14) 0.0742(15) 0.0431(11) 0.0080(10) 0.0086(10) -0.0137(11)

C8 0.0549(12) 0.0473(11) 0.0675(13) -0.0022(9) 0.0116(10) -0.0038(9)

C18 0.0514(11) 0.0557(12) 0.0487(11) 0.0092(9) -0.0015(9) -0.0108(9)

C12 0.0739(15) 0.0658(13) 0.0554(12) 0.0034(10) -0.0025(11) -0.0154(11)

C4 0.0616(13) 0.0638(13) 0.0424(11) 0.0045(9) 0.0066(9) 0.0086(10)

C7 0.0483(11) 0.0481(11) 0.0477(10) 0.0003(8) 0.0091(8) -0.0051(8)

C2 0.0709(15) 0.0642(13) 0.0626(14) -0.0156(11) 0.0037(11) -0.0103(11)

C9 0.0654(14) 0.0539(13) 0.0981(19) -0.0163(12) 0.0221(13) -0.0124(11)

C3 0.0757(15) 0.0782(15) 0.0456(12) -0.0132(11) 0.0001(10) 0.0004(12)

C16 0.0770(15) 0.0728(15) 0.0492(12) -0.0102(10) 0.0201(10) -0.0091(12)

C10 0.0688(16) 0.0844(18) 0.0860(19) -0.0345(15) 0.0221(13) -0.0307(13)

C11 0.0782(17) 0.104(2) 0.0560(14) -0.0103(13) -0.0018(11) -0.0251(15)

C20 0.0743(15) 0.0662(14) 0.0696(14) 0.0216(11) 0.0014(11) -0.0046(11)

_geom_special_details

;

All esds (except the esd in the dihedral angle between two l.s. planes)

are estimated using the full covariance matrix. The cell esds are taken

into account individually in the estimation of esds in distances, angles

and torsion angles; correlations between esds in cell parameters are only

used when they are defined by crystal symmetry. An approximate (isotropic)

treatment of cell esds is used for estimating esds involving l.s. planes.

;

loop_

_geom_bond_atom_site_label_1

_geom_bond_atom_site_label_2

_geom_bond_distance

_geom_bond_site_symmetry_2

_geom_bond_publ_flag

N2 C5 1.323(2) . ?

N2 C6 1.369(2) . ?

N1 C1 1.377(2) . ?

N1 C13 1.387(2) . ?

N1 C5 1.395(2) . ?

C5 C4 1.409(3) . ?

C1 C2 1.343(3) . ?

C14 C19 1.389(3) . ?

C14 C15 1.391(3) . ?

C14 C13 1.477(2) . ?

C19 C18 1.387(2) . ?

C6 C13 1.378(2) . ?

C6 C7 1.478(2) . ?

C15 C16 1.380(3) . ?

C17 C16 1.378(3) . ?

C17 C18 1.380(3) . ?

C8 C9 1.374(3) . ?

C8 C7 1.385(3) . ?

C18 C20 1.499(3) . ?

C12 C7 1.384(3) . ?

C12 C11 1.387(3) . ?

C4 C3 1.354(3) . ?

C2 C3 1.411(3) . ?

C9 C10 1.368(4) . ?

C10 C11 1.371(4) . ?

loop_

_geom_angle_atom_site_label_1

_geom_angle_atom_site_label_2

_geom_angle_atom_site_label_3

_geom_angle

_geom_angle_site_symmetry_1

_geom_angle_site_symmetry_3

_geom_angle_publ_flag

C5 N2 C6 105.70(14) . . ?

C1 N1 C13 131.27(15) . . ?

C1 N1 C5 121.76(15) . . ?

C13 N1 C5 106.90(14) . . ?

N2 C5 N1 110.93(15) . . ?

N2 C5 C4 130.60(17) . . ?

N1 C5 C4 118.46(17) . . ?

C2 C1 N1 118.87(19) . . ?

C19 C14 C15 118.57(17) . . ?

C19 C14 C13 120.61(16) . . ?

C15 C14 C13 120.80(17) . . ?

C18 C19 C14 122.00(18) . . ?

N2 C6 C13 111.59(15) . . ?

N2 C6 C7 120.66(15) . . ?

C13 C6 C7 127.75(16) . . ?

C16 C15 C14 119.86(19) . . ?

C6 C13 N1 104.88(15) . . ?

C6 C13 C14 132.16(16) . . ?

N1 C13 C14 122.95(15) . . ?

C16 C17 C18 121.00(18) . . ?

C9 C8 C7 121.0(2) . . ?

C17 C18 C19 118.04(19) . . ?

C17 C18 C20 122.11(18) . . ?

C19 C18 C20 119.84(19) . . ?

C7 C12 C11 120.3(2) . . ?

C3 C4 C5 119.27(19) . . ?

C12 C7 C8 118.33(18) . . ?

C12 C7 C6 122.18(17) . . ?

C8 C7 C6 119.48(17) . . ?

C1 C2 C3 121.1(2) . . ?

C10 C9 C8 120.3(2) . . ?

C4 C3 C2 120.55(19) . . ?

C17 C16 C15 120.5(2) . . ?

C9 C10 C11 119.8(2) . . ?

C10 C11 C12 120.3(2) . . ?

_diffrn_measured_fraction_theta_max 1.000

_diffrn_reflns_theta_full 25.00

_diffrn_measured_fraction_theta_full 1.000

_refine_diff_density_max 0.176

_refine_diff_density_min -0.131

_refine_diff_density_rms 0.032
